# Supplementary material
Source: publisher site journal article supplement (https://www.degruyterbrill.com/publication/isbn/9783110337358/downloadAsset/9783110337358_Customized%20Address%20Data%20Publishers--en.pdf)
Supplement: Supplementary file 1 [file 9783110337358_Customized%20Address%20Data%20Publishers--en.pdf]

# Content Licensing – Customized Address Data

**Complement your own data collection or enhance your applications with our content.** ISBN agencies all over the world are constantly contributing to keep our reference work up-to-date. We can provide **official ISBN information** and **contact details** for you to integrate into your own database and use under license.

## Publishers worldwide:

- more than 1 million publishers
- from more than 200 countries or territories

## Criteria for data selection:

- Country, Place Name
- ISBN Prefix

Example: publishers with prefix 978-2 (French-speaking)  
in Belgium: 2.451

Our price depends on the  
components you choose:

- basic information (full name, postal address)
- contact information (telephone / fax number, email address, URL)
- contact person(s)
- further information (ISBN prefixes)

## Contact

Don't hesitate to ask for a free quote for your customized data selection.

The data can be provided in a tabular format (Excel, Access, CSV) on CD-ROM or via FTP.

Please state as precisely as possible what selection you are interested in. Would you like to use the data only once or do you want to integrate it into your own data collection or application for indefinite use?

For further information please get in touch with:

Walter de Gruyter GmbH  
Rights & Licenses  
E-mail: [rights@degruyter.com](mailto:rights@degruyter.com)
